# Supplementary material for: Early ficolin-1 is a sensitive prognostic marker for functional outcome in ischemic stroke
Source: PubMed Central journal article supplement (PMC4721111; doi:10.1186/s12974-016-0481-2), 2016-01-20
Supplement: 12974_2016_481_MOESM2_ESM.pdf [file 12974_2016_481_MOESM2_ESM.pdf]

**Table S2.1. Baseline and clinical characteristics between cohorts**

|                                    | <b>6h<br/>(n=80)</b> | <b>48h<br/>(n=85)</b> | <b>univariate<br/><i>p</i> (value)</b> | <b>multivariate<br/><i>p</i> (value)</b> |
|------------------------------------|----------------------|-----------------------|----------------------------------------|------------------------------------------|
| <b>Demographic characteristics</b> |                      |                       |                                        |                                          |
| Age $\geq$ 50 y, <i>n</i> (%)      | 75(94)               | 73(86)                | 0.126                                  | -                                        |
| Gender, (M/F)                      | 33/47                | 49/36                 | <b>0.043</b>                           | 0.768                                    |
| Race caucasian, <i>n</i> (%)       | 80(100)              | 82(96)                | 0.246                                  | -                                        |
| <b>Risk factors, <i>n</i> (%)</b>  |                      |                       |                                        |                                          |
| Hypertension                       | 60(75)               | 60(70)                | 0.601                                  | -                                        |
| Diabetes                           | 11(14)               | 29(34)                | <b>0.003</b>                           | <b>0.003</b>                             |
| Dyslipidemia                       | 43(54)               | 39(46)                | 0.352                                  | -                                        |
| Cardiovascular Diseases            | 24(30)               | 19(22)                | 0.291                                  | -                                        |
| Atrial Fibrillation                | 30(37)               | 15(18)                | <b>0.007</b>                           | 0.118                                    |
| Smoking History                    | 21(26)               | 44(57)                | <b>0.001</b>                           | <b>0.008</b>                             |
| Recent Infections                  | -                    | 1(1)                  | -                                      | -                                        |
| CRP $\geq$ 3 mg/l                  | 5(6)                 | 16(19)                | <b>0.019</b>                           | <b>0.018</b>                             |
| <b>Clinical characteristics</b>    |                      |                       |                                        |                                          |
| <b>TOAST Classification, n(%)</b>  |                      |                       |                                        |                                          |
| Cardioembolism                     | 24(30)               | 23(27)                | 0.731                                  | -                                        |
| Atherosclerosis                    | 21(26)               | 33(39)                | 0.098                                  | -                                        |
| Small Vessel Occlusion             | 11(14)               | 6(7)                  | 0.296                                  | -                                        |
| Undetermined Etiology              | 24(30)               | 22(25)                | 0.604                                  | -                                        |
| Other Determined Etiology          | -                    | 2(2)                  | -                                      | -                                        |
| <b>NIHSS, Median (IQR)</b>         | 5(2- 11)             | 5(2- 11)              |                                        |                                          |
| Severe ( $>14$ ), <i>n</i> (%)     | 12(16)               | 14(17)                | 1                                      | -                                        |
| <b>3-month mRS, median (IQR)</b>   | 2(1- 4)              | 1(0- 3)               |                                        |                                          |
| mRS ( $>2$ ), <i>n</i> (%)         | 33(41)               | 36(42)                | 0.274                                  | -                                        |
| Mortality                          | 10(12)               | 2(3)                  | <b>0.036</b>                           | 0.999                                    |

TOAST: Trial of Org 10172 in Acute Stroke Treatment; NIHSS: National Institutes of Health Stroke Scale; 3- month mRS: 3- month modified Rankin scale. CRP: C-reactive protein. Categorical variables are presented as number of patients with/without percentages in parentheses; continuous variables as median with interquartile range (IQR). Age is presented as dichotomized using 50 years as cut-off (based on the minimum quartile in control group). Exact *p* value between cohorts by univariate and multivariate logistic regression analysis.

**Table S2.2. Ficolins and MBL vs confounding factors**

|                   | <b>Ficolin-1</b> | <b>Ficolin-2</b> | <b>Ficolin-3</b> | <b>MBL</b> |
|-------------------|------------------|------------------|------------------|------------|
| <b>6h</b>         |                  |                  |                  |            |
| Diabetes          | 0.265            | 0.322            | 0.700            | 0.831      |
| Smoking History   | 0.536            | 0.509            | 0.919            | 0.461      |
| CRP $\geq$ 3 mg/l | 0.1              | 0.144            | 0.437            | 0.125      |
| <b>48h</b>        |                  |                  |                  |            |
| Diabetes          | 0.225            | 0.364            | 0.330            | 0.983      |
| Smoking History   | 0.140            | 0.120            | <b>0.015</b>     | 0.747      |
| CRP $\geq$ 3 mg/l | 0.169            | 0.677            | 0.791            | 0.733      |

Exact *p* value by Wilcoxon-Mann-Whitney test.
