# Supplementary material for: Early ficolin-1 is a sensitive prognostic marker for functional outcome in ischemic stroke
Source: PubMed Central journal article supplement (PMC4721111; doi:10.1186/s12974-016-0481-2), 2016-01-20
Supplement: 12974_2016_481_MOESM3_ESM.pdf [file 12974_2016_481_MOESM3_ESM.pdf]

**Table S3. Comparison of the crude performance of early ficolin-1 and diagnostic markers of functional outcome in patients enrolled within 6h**

| Predictors             | ROC  |            |          |
|------------------------|------|------------|----------|
|                        | AUC  | CI 95%     | <i>p</i> |
| <b>6h</b>              |      |            |          |
| CRP                    | 0.72 | 0.60- 0.83 | 0.001    |
| D-dimer                | 0.65 | 0.52- 0.79 | 0.02     |
| Ficolin-1+ CRP         | 0.69 | 0.57- 0.81 | 0.012    |
| Ficolin-1 + D-Dimer    | 0.66 | 0.53- 0.79 | 0.005    |
| Ficolin-1+ CRP+D-dimer | 0.73 | 0.60- 0.84 | 0.001    |

ROC analysis data of ficolin-1, C-reactive protein (CRP) and D-dimer. The AUC and exact *p* value for asymptotic significance are reported. Area Under the Curve (AUC); 95% Confidence Interval (CI 95%).
