# Supplementary material for: Early ficolin-1 is a sensitive prognostic marker for functional outcome in ischemic stroke
Source: PubMed Central journal article supplement (PMC4721111; doi:10.1186/s12974-016-0481-2), 2016-01-20
Supplement: 12974_2016_481_MOESM4_ESM.pdf [file 12974_2016_481_MOESM4_ESM.pdf]

**Table S4. Univariate and multivariate predictors of functional outcome assuming the worst scenario for patients lost to follow up**

| Predictors              | 48h                    |              |                         |              |
|-------------------------|------------------------|--------------|-------------------------|--------------|
|                         | univariate             |              | multivariate            |              |
|                         | OR(CI 95%)             | <i>p</i>     | OR(CI 95%)              | <i>p</i>     |
| Age                     | 1.01(0.97- 1.05)       | 0.58         | -                       | -            |
| Gender                  | 0.82(0.34-1.99)        | 0.66         | -                       | -            |
| Hypertension            | <b>0.32(0.12-0.84)</b> | <b>0.02</b>  | <b>0.31(0.11- 0.87)</b> | <b>0.03</b>  |
| Diabetes                | 1.18(0.47-2.94)        | 0.73         | -                       | -            |
| Dyslipidemia            | 0.53(0.22-1.29)        | 0.16         | -                       | -            |
| Cardiovascular Diseases | 1.05(0.17-6.67)        | 0.96         | -                       | -            |
| Atrial Fibrillation     | 0.75(0.23-2.43)        | 0.63         | -                       | -            |
| Smoking History         | 1.06(0.35-3.05)        | 0.90         | -                       | -            |
| Toast Classification    | 1.01(0.85-1.43)        | 0.47         | -                       | -            |
| NIHSS                   | <b>1.14(1.06-1.24)</b> | <b>0.001</b> | <b>1.14(1.06-1.24)</b>  | <b>0.001</b> |
| Ficolin-1               | 1.55(0.13-18.01)       | 0.73         | -                       | -            |
| Ficolin-3               | 0.95(0.88-1.03)        | 0.21         | -                       | -            |

Exact *p* value for univariate and multivariate logistic regression analysis is reported. 95% Confidence Interval (CI 95%); Odds Ratio (OR). NIHSS: National Institutes of Health Stroke Scale; 3- month mRS: 3-month modified Rankin
