# Supplementary material for: Early ficolin-1 is a sensitive prognostic marker for functional outcome in ischemic stroke
Source: PubMed Central journal article supplement (PMC4721111; doi:10.1186/s12974-016-0481-2), 2016-01-20
Supplement: 12974_2016_481_MOESM5_ESM.pdf [file 12974_2016_481_MOESM5_ESM.pdf]

**Table S5. Leukocyte count in 48h cohort**

| <b>Spearman rho</b>                      | correlation coefficient | <i>p</i> |
|------------------------------------------|-------------------------|----------|
| <b>ficolin-1 vs inflammatory markers</b> |                         |          |
| Leukocyte Count (10 <sup>3</sup> /U1)    | 0.34                    | 0.008    |
| Neutrophil Count (%)                     | 0.33                    | 0.08     |
| Lymphocyte count (%)                     | - 0.36                  | 0.003    |
| N/L ratio                                | 0.33                    | 0.08     |

Spearman's rho for ficolin-1 vs leucocytes. N/L ratio (Neutrophil Lymphocyte Ratio).
